# Supplementary material
Source: PubMed Central journal article supplement (PMC11262615)
Supplement: NIHMS1998926-supplement-1.pdf [file NIHMS1998926-supplement-1.pdf]

**Table S1. Potentiating activities of the 13 CFTR primary hits, related to Figure 1.**

| ID          | 2D structure by NMR | Purity (%) | Fold of stimulation<br>(mean $\pm$ SEM) |
|-------------|---------------------|------------|-----------------------------------------|
| Z2075279358 |                     | 99.6       | 2.38 $\pm$ 0.24 (n=3)                   |
| Z2194302854 |                     | 98.8       | 1.39 $\pm$ 0.08 (n=3)                   |
| Z1343848401 |                     | 99.7       | 1.37 $\pm$ 0.08 (n=6)                   |
| Z2776419998 |                     | 99.1       | 1.36 $\pm$ 0.08 (n=3)                   |
| Z1224795288 |                     | 97.7       | 1.34 $\pm$ 0.08 (n=3)                   |
| Z19702639   |                     | 91.2       | 1.32 $\pm$ 0.04 (n=4)                   |
| Z1096199008 |                     | 97         | 1.30 $\pm$ 0.04 (n=4)                   |
| Z873519648  |                     | >99        | 1.27 $\pm$ 0.11 (n=3)                   |
| Z1783799713 |                     | 97.8       | 1.25 $\pm$ 0.04 (n=4)                   |
| Z899051432  |                     | >99        | 1.24 $\pm$ 0.04 (n=6)                   |
| Z1262422554 |                     | >99        | 1.17 $\pm$ 0.03 (n=5)                   |
| Z2171315755 |                     | 95         | 1.17 $\pm$ 0.09 (n=3)                   |
| Z995908944  |                     | >99        | 1.15 $\pm$ 0.03 (n=4)                   |

**Table S2. Summary of EM data and structure refinement statistics for CFTR in complex with '853, related to Figure 3 and Figure S2.**

---

| <b>Data collection</b>                 |                   |
|----------------------------------------|-------------------|
| Microscope                             | Titan Krios (FEI) |
| Voltage (kV)                           | 300               |
| Detector                               | K2 Summit (Gatan) |
| Pixel size (Å)                         | 1.03              |
| Defocus range (μm)                     | 1 to 2.5          |
| Movies                                 | 6,967             |
| Frames/movie                           | 50                |
| Dose rate (electrons/pixel/s)          | 8                 |
| Total dose (electrons/Å <sup>2</sup> ) | 75                |
| Number of particles                    | 1,948,497         |
| <b>Model composition</b>               |                   |
| Non-hydrogen atoms                     | 9,682             |
| Protein residues                       | 1,035             |
| Lipids                                 | 5                 |
| ATP                                    | 2                 |
| Mg                                     | 2                 |
| <b>Refinement</b>                      |                   |
| Resolution (Å)                         | 3.8               |
| Sharpening B-factor (Å <sup>2</sup> )  | -117              |
| RMS deviations                         |                   |
| Bond lengths (Å)                       | 0.005             |
| Bond angles (°)                        | 0.863             |
| <b>Validation</b>                      |                   |
| Molprobit score                        | 2.09              |
| Clashscore, all atoms                  | 16                |
| Favored rotamers (%)                   | 99.9              |
| Ramachandran plot (%)                  |                   |
| Favored                                | 94.87             |
| Allowed                                | 5.13              |
| Outliers                               | 0.0               |

---
