# Supplementary material
Source: PubMed Central journal article supplement (PMC11262615)

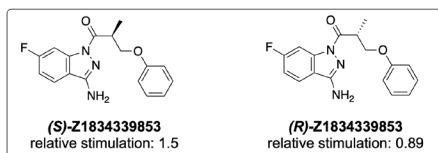

**(1) Replacing the fluorine with a larger side chain**

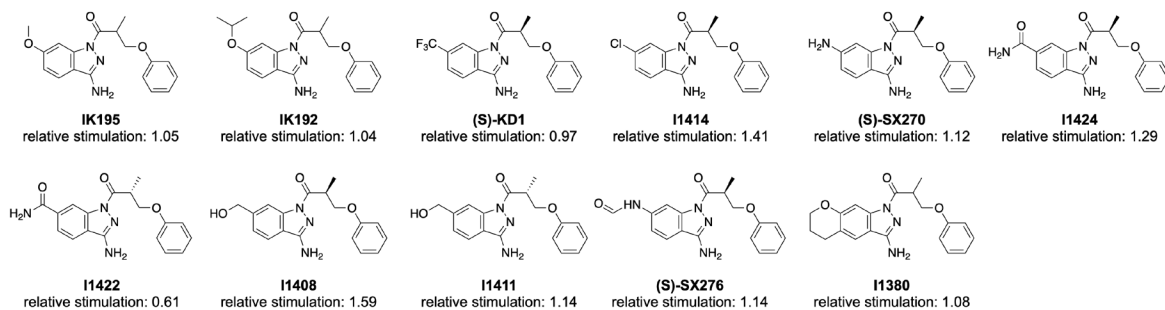

**(2) Modification to the linker**

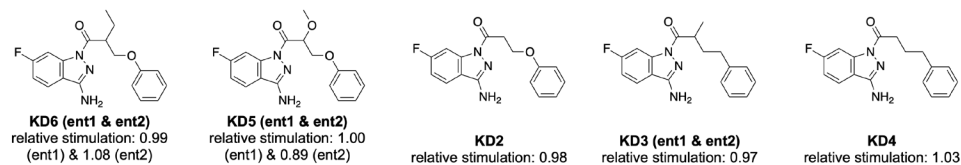

**(3) Removing the amino group's hydrogen donor functionality**

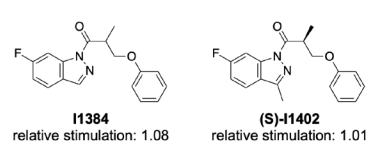

**(4) Replacing the terminal phenyl ring**

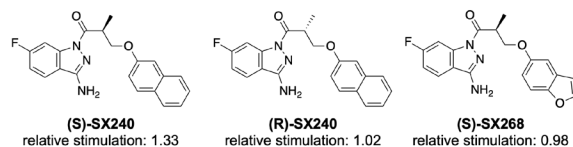

**(5) Modification to the phenyl ring**

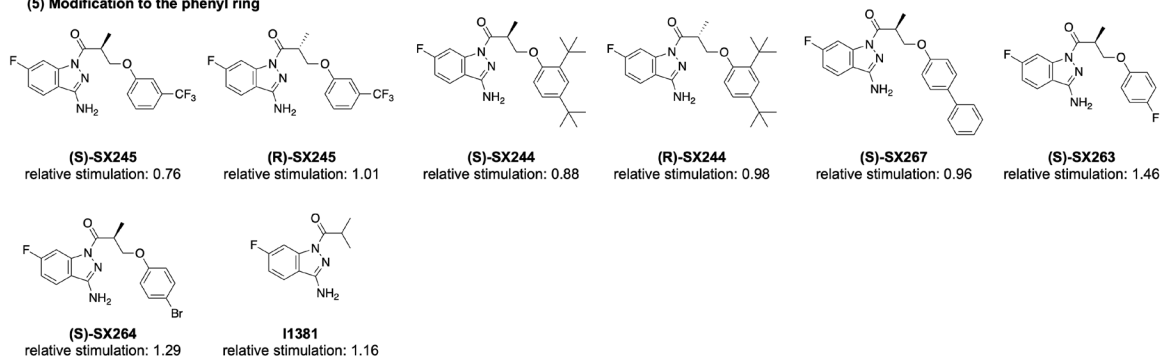

**(6) More than one modification**

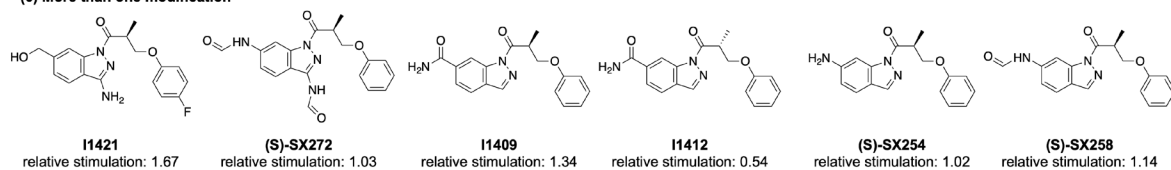

Supplement: NIHMS1998926-supplement-4.pdf [file NIHMS1998926-supplement-4.pdf]
