# Supplementary material
Source: PubMed Central journal article supplement (PMC11262615)

### Dataset 1

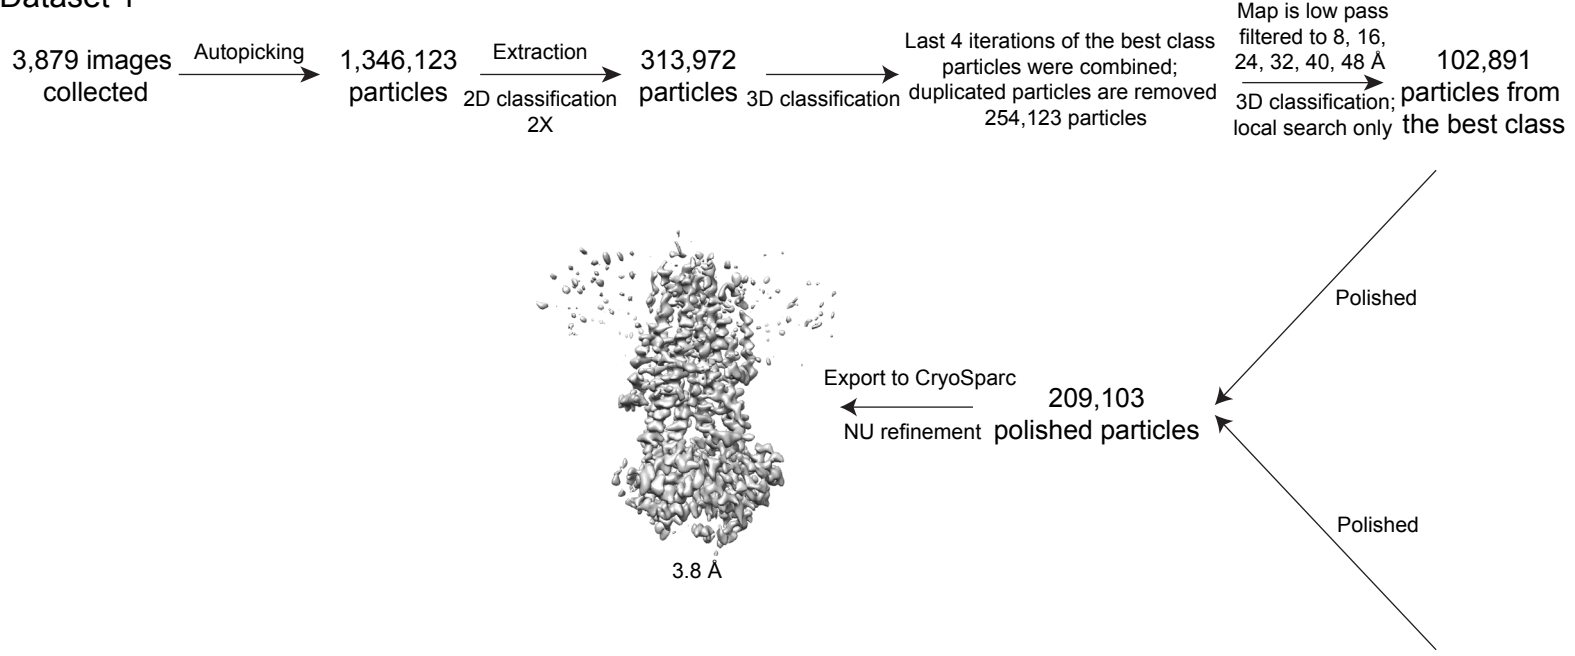

### Dataset 2

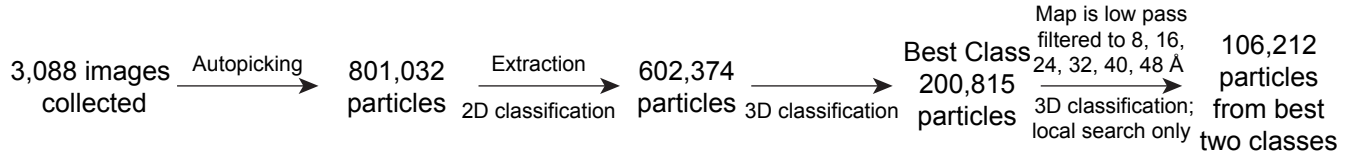

Supplement: NIHMS1998926-supplement-3.pdf [file NIHMS1998926-supplement-3.pdf]
